# Supplementary material for: Ocean acidification trends and carbonate system dynamics across the North Atlantic subpolar gyre water masses during 2009–2019
Source: Copernicus journal article supplement (doi:10.5194/bg-21-5561-2024), 2024-12-13
Supplement: Supplementary file 1 [file bg-21-5561-2024-supplement.pdf]

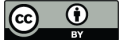

*Supplement of*

## **Ocean acidification trends and carbonate system dynamics across the North Atlantic subpolar gyre water masses during 2009–2019**

**David Curbelo-Hernández et al.**

*Correspondence to:* Melchor González-Dávila ([melchor.gonzalez@ulpgc.es](mailto:melchor.gonzalez@ulpgc.es))

The copyright of individual parts of the supplement might differ from the article licence.

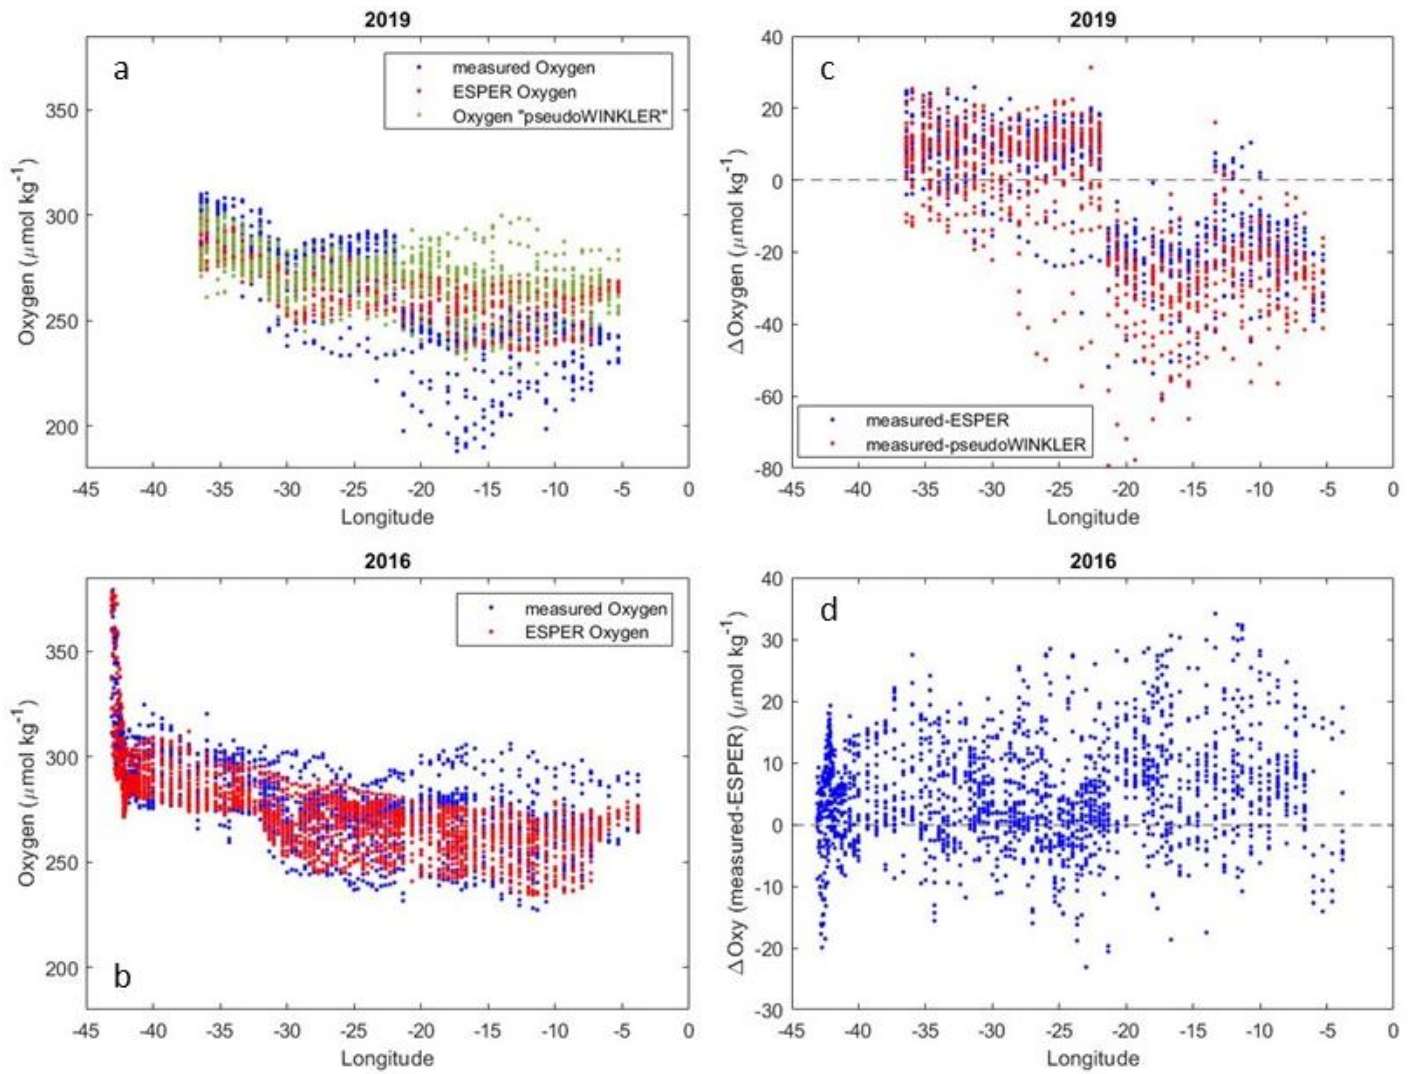

Figure S1. Longitudinal distribution of (a) sensor-measured, ESPER-estimated and pseudo-WINKLER oxygen data for 2019, (b) WINKLER-measured and ESPER-estimated data for 2016, (c)  $\Delta\text{DO}_{\text{meas-ESPER}}$  and  $\Delta\text{DO}_{\text{meas-pseudoWINKLER}}$  for the cruise of 2019 and (d)  $\Delta\text{DO}_{\text{meas-ESPER}}$  for the cruise of 2016.

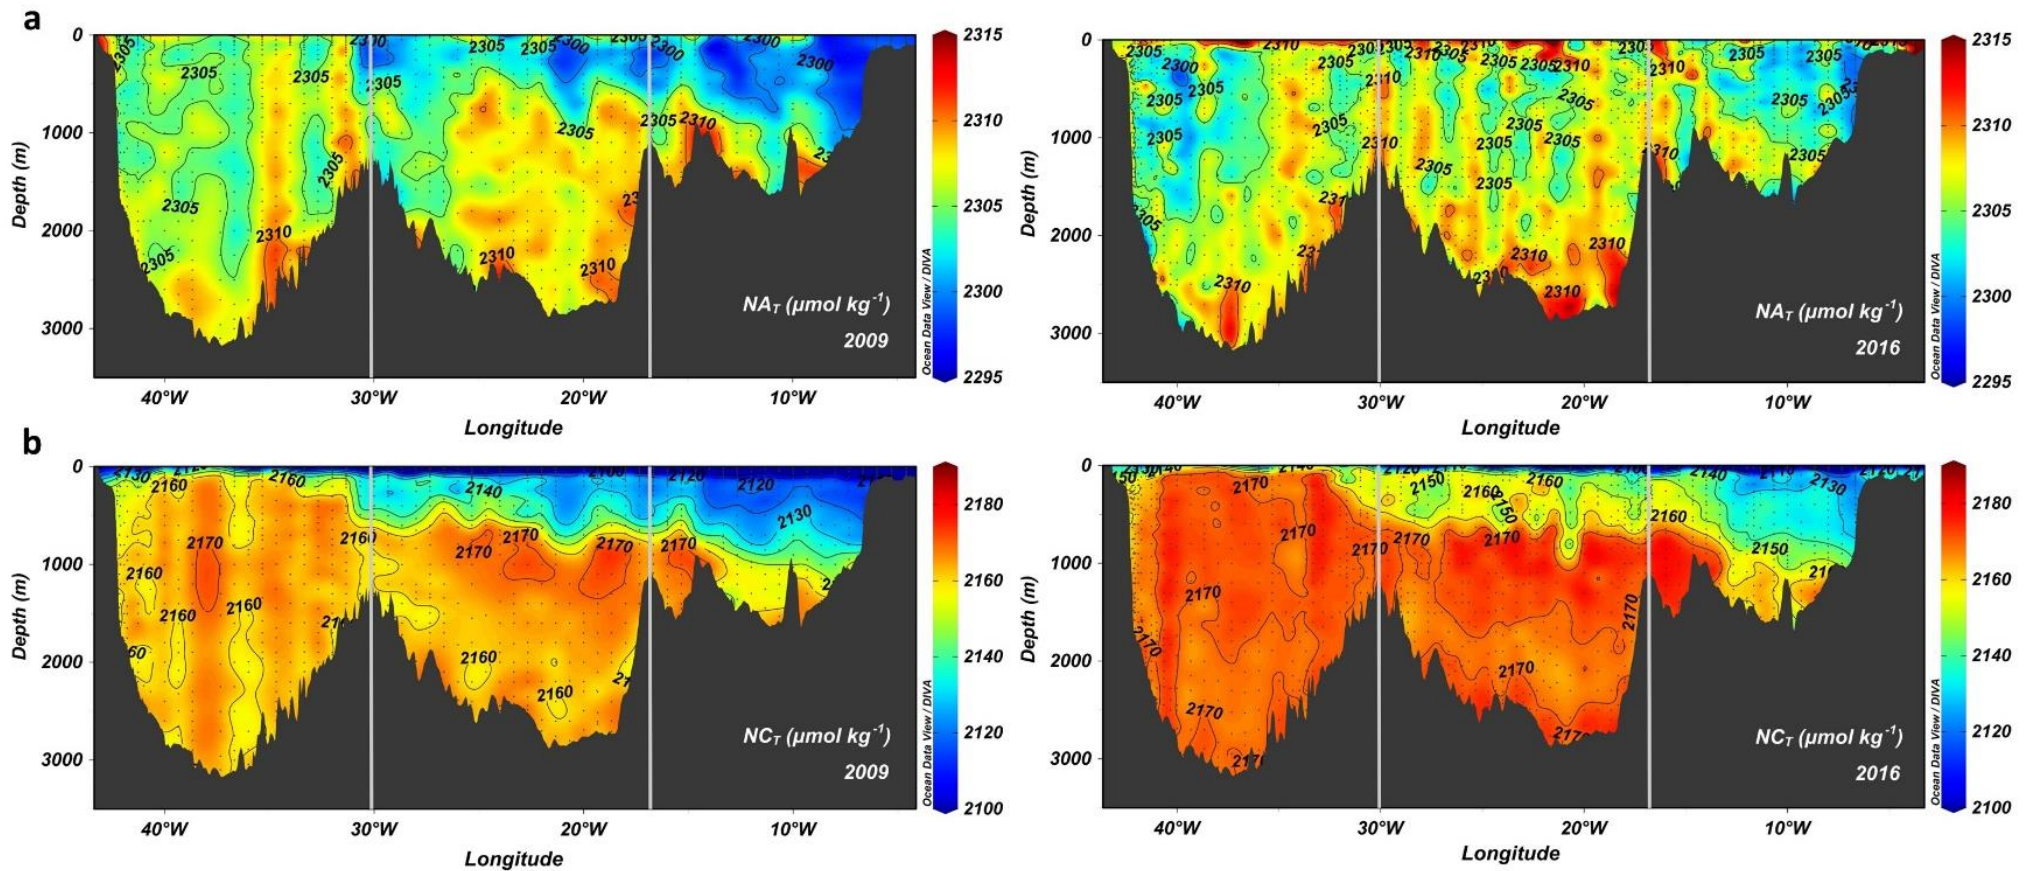

Figure S2. Water-column distribution along the longitudinal transect of (a)  $NA_T$  and (b)  $NC_T$  for the cruises of 2009 (left plots) and 2016 (right plots). The vertical white lines show the limits between basins. Figure produced with Ocean Data View (Schlitzer, Reiner, Ocean Data View, <https://odv.awi.de>, 2021).

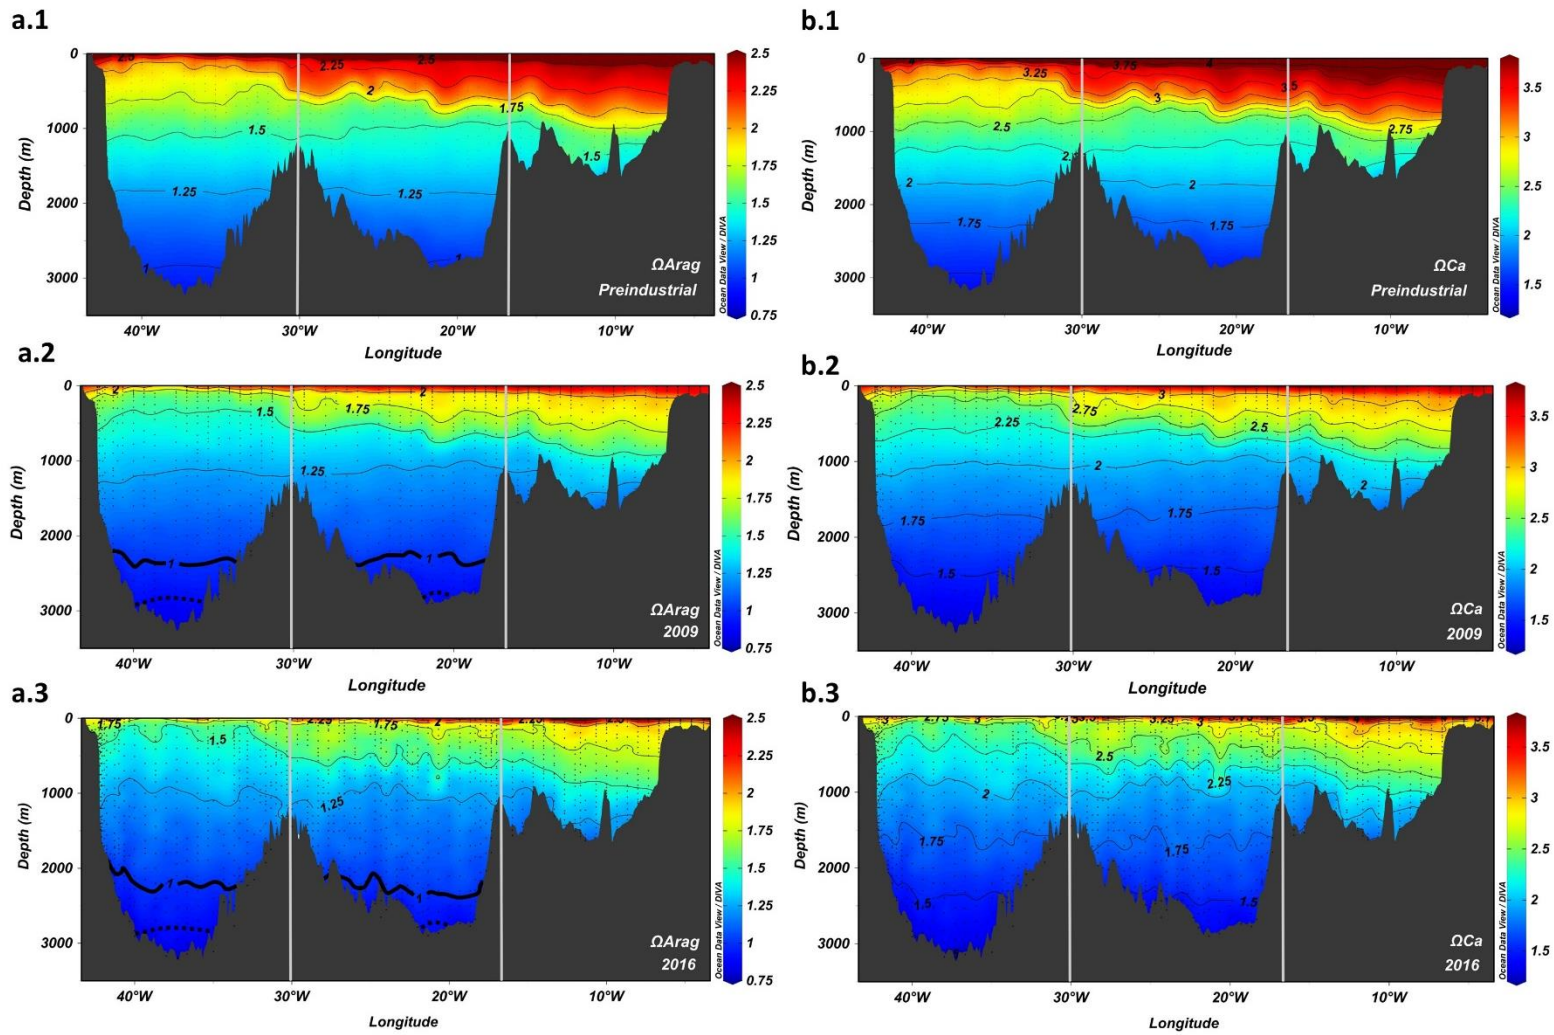

Figure S3. Water-column distribution along the longitudinal transect of (a)  $\Omega_{\text{Arag}}$  and (b)  $\Omega_{\text{Ca}}$  for preindustrial times and for the cruises of 2009 and 2016. The preindustrial  $\Omega_{\text{Arag}}$  and  $\Omega_{\text{Ca}}$  values were computed with the  $\text{CO}_2_{\text{sys}}$  programme (Lewis and Wallace, 1998) run with the MATLAB software (van Heuven et al., 2011; Orr et al., 2018; Sharp et al., 2023) using as input  $\text{CO}_2$  system variables the  $A_{\text{T}}$  and the  $C_{\text{nat}}$ . In panels a.2 and a.3, the highlighted continuous black isolines represent the aragonite saturation state horizon during the cruises of 2009 and 2016, respectively, while dash isolines show the aragonite saturation state horizon in preindustrial times. The vertical white lines show the limits between basins. Figure produced with Ocean Data View (Schlitzer, Reiner, Ocean Data View, <https://odv.awi.de>, 2021).

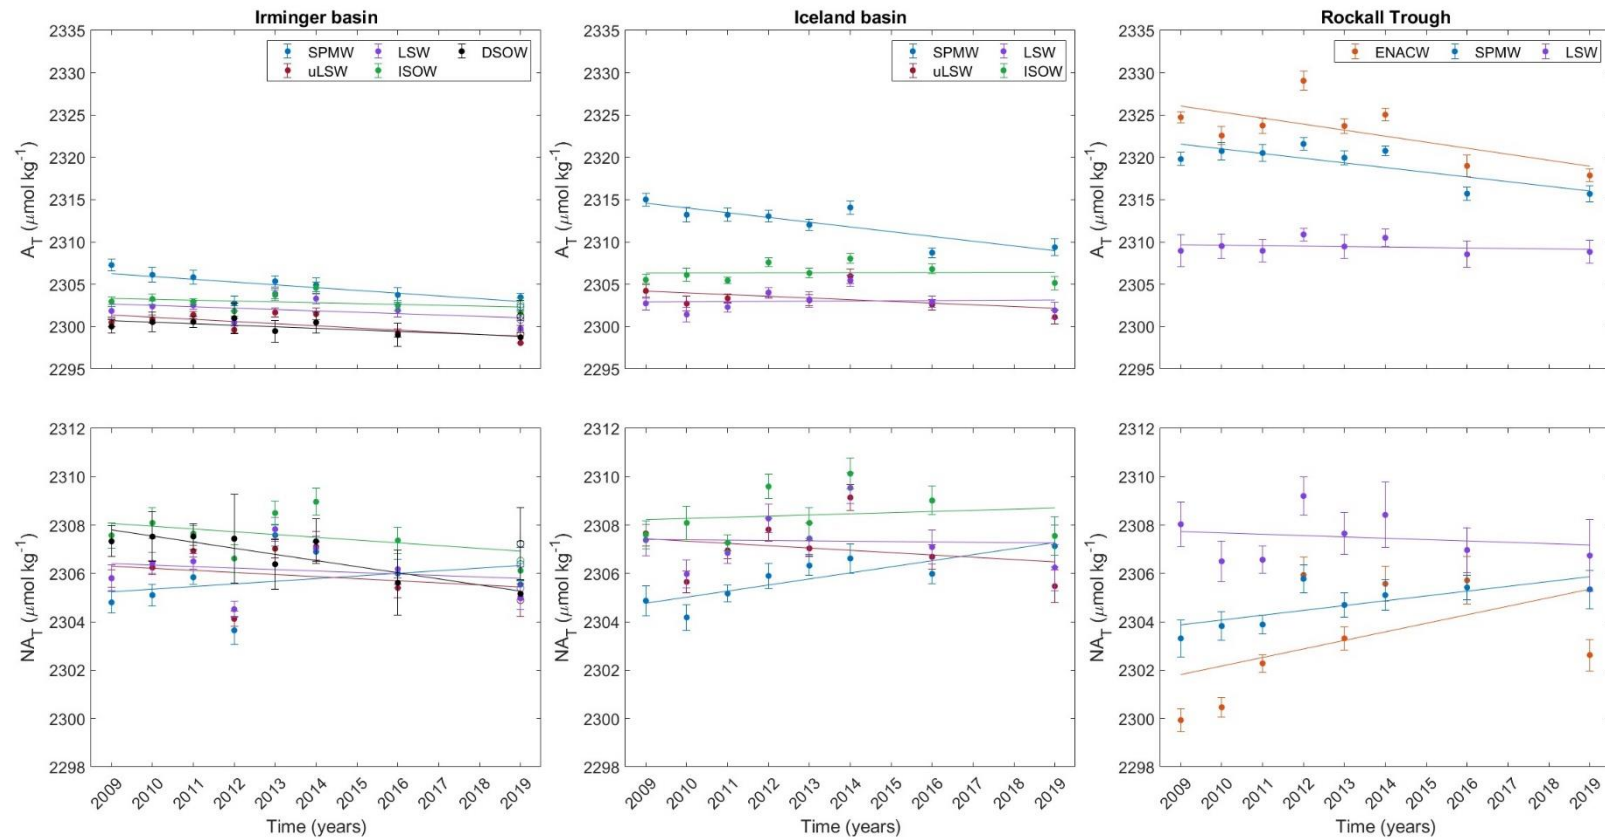

Figure S4. Temporal distribution (2009-2019) of the average  $A_T$  and  $NA_T$  in each of the layers considered for the Irminger (left plot column), Iceland (central plot column) and Rockall basins (right plot column). The average values were calculated for each cruise and layer and represented with coloured points together with their respective error bars at the time of each cruise (the method used for calculations was described in section 3.2). In the Irminger plots, the empty points represent the average values for 2019 calculated with the measured data available in the easternmost part of the basin (sampled part during this cruise), while the coloured points for 2019 represent the average values corrected with A25-OVIDE-2018 data. The interannual trend were given by linear regression of the average values, with the values of the slope, the standard error of estimate and the  $r^2$  presented in Table S4.

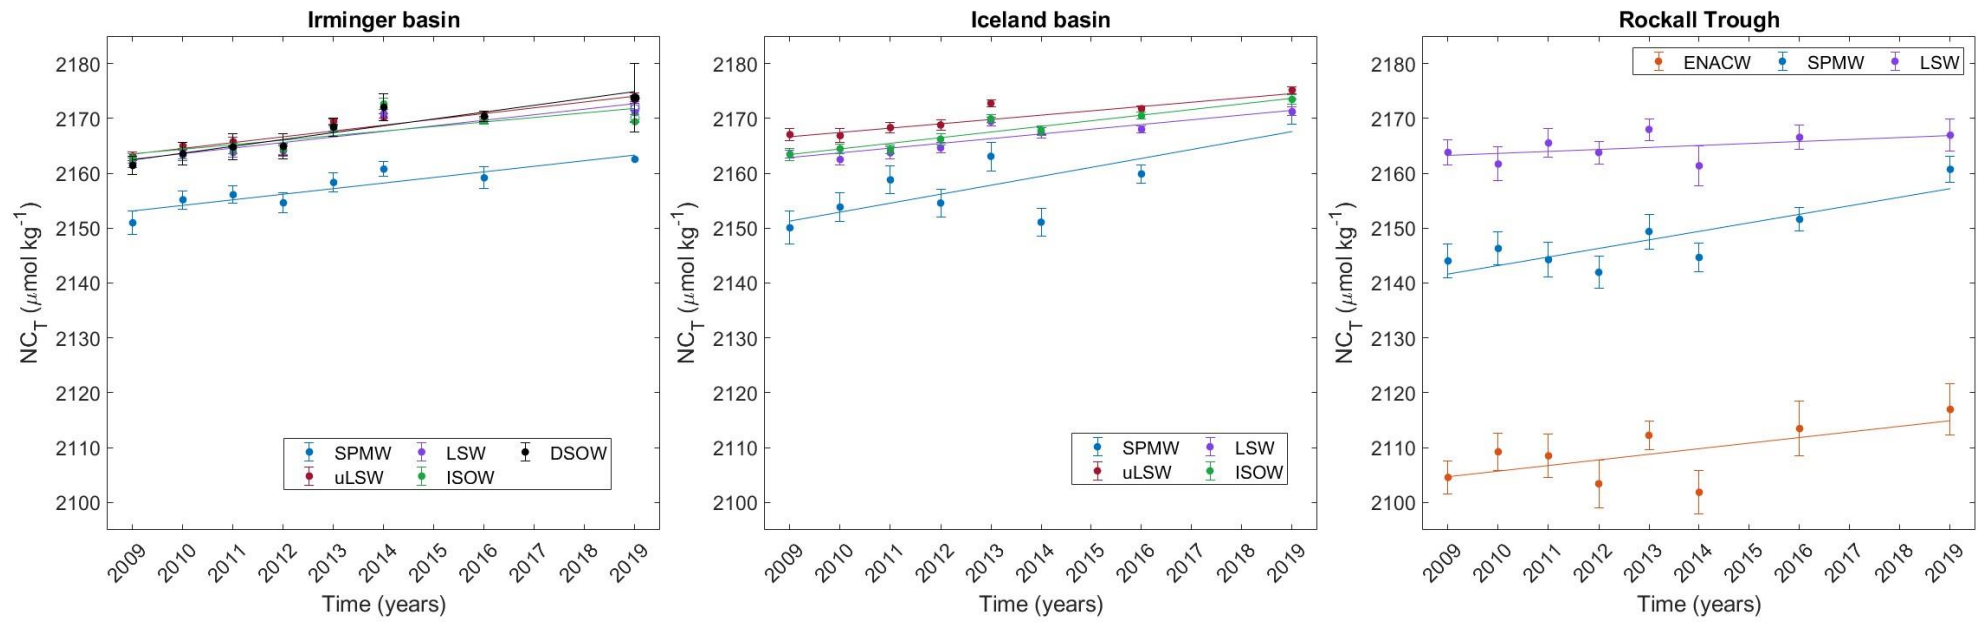

Figure S5. Same as Figure S4 but for  $NC_T$ .

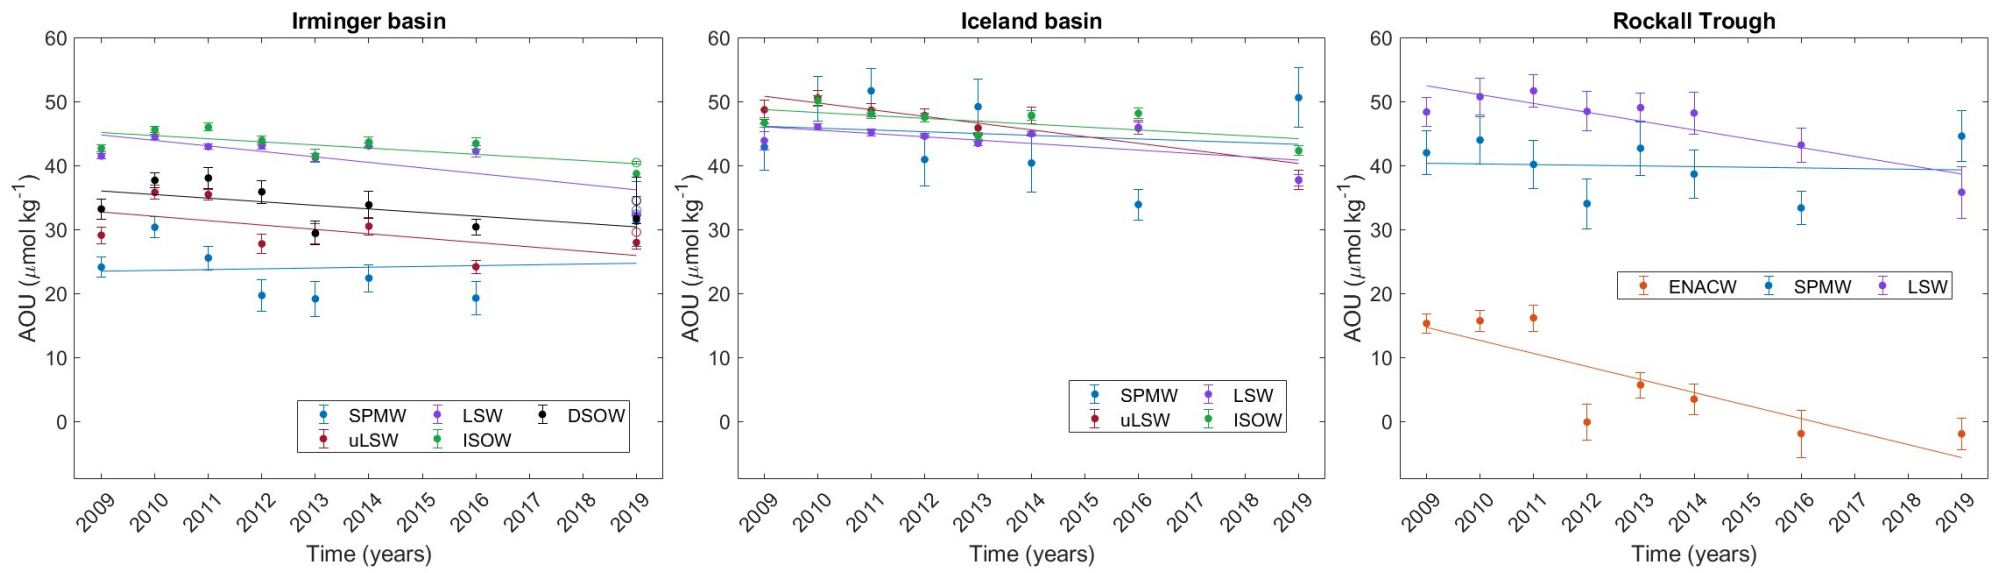

Figure S6. Same as Figure S4 but for AOU.

Table S1. Amount of data (n), mean values and standard deviation (std) per cruise for the measured temperature, salinity, A<sub>T</sub>, C<sub>T</sub>, pH<sub>T</sub>, DO, PO<sub>4</sub> and Si(OH)<sub>4</sub>.

| Cruise | Temperature (°C) |       |       | Salinity |        |       | A <sub>T</sub> (μmol kg <sup>-1</sup> ) |        |      | C <sub>T</sub> (μmol kg <sup>-1</sup> ) |        |      | pH <sub>T</sub> |        |        | DO (μmol kg <sup>-1</sup> ) |       |      | PO <sub>4</sub> (μmol kg <sup>-1</sup> ) |      |      | Si(OH) <sub>4</sub> (μmol kg <sup>-1</sup> ) |      |      |
|--------|------------------|-------|-------|----------|--------|-------|-----------------------------------------|--------|------|-----------------------------------------|--------|------|-----------------|--------|--------|-----------------------------|-------|------|------------------------------------------|------|------|----------------------------------------------|------|------|
|        | n                | mean  | std   | n        | mean   | std   | n                                       | mean   | std  | n                                       | mean   | std  | n               | mean   | std    | n                           | mean  | std  | n                                        | mean | std  | n                                            | mean | std  |
| 2009   | 1307             | 6.509 | 2.966 | 1307     | 35.094 | 0.177 | 1087                                    | 2308.5 | 12.8 | 559                                     | 2149.3 | 20.2 | 975             | 8.0066 | 0.0387 | 1297                        | 266.8 | 16.7 | 1319                                     | 0.96 | 0.22 | 1326                                         | 8.83 | 3.44 |
| 2010   | 1192             | 6.711 | 3.233 | 1192     | 35.089 | 0.173 | 870                                     | 2309.7 | 9.0  | 763                                     | 2151.8 | 23.5 | 1071            | 7.9978 | 0.0365 | 1178                        | 261.3 | 15.7 | 1220                                     | 0.88 | 0.27 | 1228                                         | 8.42 | 3.96 |
| 2011   | 1279             | 5.979 | 2.770 | 1279     | 35.055 | 0.156 | 1080                                    | 2308.4 | 9.5  | 851                                     | 2154.1 | 21.1 | 1035            | 7.9994 | 0.0350 | 1167                        | 266.2 | 15.4 | 1284                                     | 0.92 | 0.23 | 1284                                         | 8.67 | 3.72 |
| 2012   | 1205             | 5.867 | 2.541 | 1205     | 35.056 | 0.159 | 1189                                    | 2308.3 | 12.5 | 900                                     | 2152.9 | 20.8 | 1126            | 8.0105 | 0.0438 | 1136                        | 272.9 | 17.6 | 1163                                     | 0.91 | 0.21 | 1158                                         | 8.22 | 3.49 |
| 2013   | 1235             | 6.354 | 2.592 | 1235     | 35.057 | 0.158 | 1324                                    | 2306.8 | 15.3 | 1206                                    | 2154.4 | 19.4 | 1199            | 8.0077 | 0.0394 | 1223                        | 272.3 | 19.0 | 1248                                     | 0.90 | 0.21 | 1279                                         | 7.56 | 3.73 |
| 2014   | 1226             | 6.476 | 2.889 | 1226     | 35.068 | 0.157 | 1059                                    | 2307.7 | 16.1 | 983                                     | 2151.0 | 25.5 | 1196            | 8.0089 | 0.0454 | 1211                        | 271.3 | 16.5 | 1272                                     | 0.90 | 0.27 | 1275                                         | 6.82 | 3.67 |
| 2016   | 1849             | 5.514 | 2.253 | 1849     | 35.001 | 0.114 | 1557                                    | 2305.6 | 8.2  | 1465                                    | 2157.9 | 19.0 | 1349            | 7.9959 | 0.0415 | 1676                        | 276.1 | 16.5 | 1608                                     | 0.96 | 0.23 | 1642                                         | 7.49 | 2.97 |
| 2019   | 768              | 6.721 | 3.146 | 768      | 35.042 | 0.126 | 808                                     | 2307.3 | 8.6  | 768                                     | 2155.3 | 28.6 | 755             | 7.9796 | 0.0480 | 768                         | 271.4 | 16.2 | -                                        | -    | -    | -                                            | -    | -    |





Table S3. Amount (n) and percentage of measured and computed  $C_T$  data per cruise used to compile the  $C_T$  "new". No computed  $C_T$  data were used for the 2019 cruise due to lack of measured pH needed for computation.

| Cruise | $C_T$ "new" |                |            |                |            |
|--------|-------------|----------------|------------|----------------|------------|
|        | n total     | $C_T$ measured |            | $C_T$ computed |            |
|        |             | n              | percentage | n              | percentage |
| 2009   | 1088        | 501            | 46.05%     | 587            | 53.95%     |
| 2010   | 1202        | 709            | 58.98%     | 493            | 41.02%     |
| 2011   | 1029        | 645            | 62.68%     | 384            | 37.32%     |
| 2012   | 1161        | 735            | 63.31%     | 426            | 36.69%     |
| 2013   | 1307        | 1095           | 83.78%     | 212            | 16.22%     |
| 2014   | 1285        | 713            | 55.49%     | 572            | 44.51%     |
| 2016   | 1421        | 1223           | 86.07%     | 198            | 13.93%     |
| 2019   | 754         | 754            | 100%       | 0              | 0%         |

Table S4. Interannual trends of  $A_T$ ,  $NA_T$ ,  $NC_T$  and AOU in each of the layers and basins. The ratios of change were based on linear regressions applied to the average values (as represented in Supplementary Figures 2-4) and presented together with its Standard error of estimate. The correlation coefficients  $r^2$  and p-values were also provided. Values in bold denotes that trends are statistically significant at the 95% level of confidence.

| Basin    | Layer | $A_T$                                             |       |             | $NA_T$                                            |       |              | $NC_T$                                            |             |         | AOU                                               |             |         |             |      |       |              |       |             |      |       |
|----------|-------|---------------------------------------------------|-------|-------------|---------------------------------------------------|-------|--------------|---------------------------------------------------|-------------|---------|---------------------------------------------------|-------------|---------|-------------|------|-------|--------------|-------|-------------|------|-------|
|          |       | ratio ( $\mu\text{mol kg}^{-1} \text{ yr}^{-1}$ ) | $r^2$ | p-value     | ratio ( $\mu\text{mol kg}^{-1} \text{ yr}^{-1}$ ) | $r^2$ | p-value      | ratio ( $\mu\text{mol kg}^{-1} \text{ yr}^{-1}$ ) | $r^2$       | p-value | ratio ( $\mu\text{mol kg}^{-1} \text{ yr}^{-1}$ ) | $r^2$       | p-value |             |      |       |              |       |             |      |       |
| Irminger | SPMW  | <b>-0.33</b>                                      | $\pm$ | <b>0.17</b> | 0.50                                              | 0.05  | 0.13         | $\pm$                                             | 0.18        | 0.12    | 0.41                                              | <b>1.05</b> | $\pm$   | <b>0.25</b> | 0.82 | <0.01 | -0.79        | $\pm$ | 0.47        | 0.43 | 0.08  |
|          | uLSW  | -0.16                                             | $\pm$ | 0.13        | 0.27                                              | 0.19  | -0.04        | $\pm$                                             | 0.16        | 0.02    | 0.76                                              | <b>1.14</b> | $\pm$   | <b>0.20</b> | 0.89 | <0.01 | -0.80        | $\pm$ | 0.48        | 0.42 | 0.08  |
|          | LSW   | <b>-0.11</b>                                      | $\pm$ | <b>0.18</b> | 0.09                                              | 0.47  | -0.02        | $\pm$                                             | 0.15        | 0.00    | 0.90                                              | <b>1.08</b> | $\pm$   | <b>0.24</b> | 0.85 | <0.01 | <b>-0.89</b> | $\pm$ | <b>0.41</b> | 0.55 | 0.04  |
|          | ISOW  | -0.05                                             | $\pm$ | 0.13        | 0.04                                              | 0.64  | -0.05        | $\pm$                                             | 0.12        | 0.05    | 0.61                                              | <b>0.90</b> | $\pm$   | <b>0.33</b> | 0.66 | <0.01 | <b>-0.49</b> | $\pm$ | <b>0.26</b> | 0.48 | 0.05  |
|          | DSOW  | <b>-0.18</b>                                      | $\pm$ | <b>0.09</b> | 0.53                                              | 0.04  | <b>-0.24</b> | $\pm$                                             | <b>0.07</b> | 0.75    | <0.01                                             | <b>1.28</b> | $\pm$   | <b>0.23</b> | 0.89 | <0.01 | -0.62        | $\pm$ | 0.40        | 0.38 | 0.10  |
| Iceland  | SPMW  | <b>-0.56</b>                                      | $\pm$ | <b>0.19</b> | 0.70                                              | <0.01 | <b>0.25</b>  | $\pm$                                             | <b>0.08</b> | 0.72    | <0.01                                             | <b>1.63</b> | $\pm$   | <b>0.70</b> | 0.59 | 0.03  | -0.28        | $\pm$ | 0.98        | 0.02 | 0.73  |
|          | uLSW  | -0.20                                             | $\pm$ | 0.19        | 0.22                                              | 0.24  | -0.10        | $\pm$                                             | 0.18        | 0.07    | 0.53                                              | <b>0.79</b> | $\pm$   | <b>0.25</b> | 0.72 | <0.01 | <b>-1.05</b> | $\pm$ | <b>0.28</b> | 0.79 | <0.01 |
|          | LSW   | 0.02                                              | $\pm$ | 0.20        | 0.00                                              | 0.88  | -0.02        | $\pm$                                             | 0.18        | 0.00    | 0.92                                              | <b>0.86</b> | $\pm$   | <b>0.22</b> | 0.80 | <0.01 | -0.52        | $\pm$ | 0.32        | 0.40 | 0.09  |
|          | ISOW  | 0.01                                              | $\pm$ | 0.16        | 0.00                                              | 0.96  | 0.05         | $\pm$                                             | 0.16        | 0.02    | 0.72                                              | <b>1.03</b> | $\pm$   | <b>0.16</b> | 0.91 | <0.01 | -0.45        | $\pm$ | 0.29        | 0.38 | 0.10  |
| Rockall  | ENACW | -0.71                                             | $\pm$ | 0.41        | 0.44                                              | 0.07  | 0.35         | $\pm$                                             | 0.32        | 0.24    | 0.21                                              | 1.02        | $\pm$   | 0.63        | 0.41 | 0.09  | <b>-2.03</b> | $\pm$ | <b>0.69</b> | 0.70 | <0.01 |
|          | SPMW  | -0.55                                             | $\pm$ | 0.22        | 0.62                                              | 0.02  | <b>0.20</b>  | $\pm$                                             | <b>0.09</b> | 0.54    | 0.04                                              | <b>1.56</b> | $\pm$   | <b>0.50</b> | 0.72 | <0.01 | -0.10        | $\pm$ | 0.66        | 0.01 | 0.85  |
|          | LSW   | <b>-0.05</b>                                      | $\pm$ | <b>0.13</b> | 0.05                                              | 0.61  | -0.06        | $\pm$                                             | 0.15        | 0.03    | 0.66                                              | 0.36        | $\pm$   | 0.33        | 0.24 | 0.22  | <b>-1.38</b> | $\pm$ | <b>0.37</b> | 0.78 | <0.01 |
